# Supplementary material for: Temperature and pressure-induced strains in anhydrous iron trifluoride polymorphs
Source: Royal Society of Chemistry journal article supplement (doi:10.1039/d0cp05888b), 2021-01-01
Supplement: d0cp05888b1.pdf [file d0cp05888b1.pdf]

## Supporting Information for

# Temperature and pressure-induced strains in anhydrous iron trifluoride polymorphs

M. Recio-Poo,<sup>a</sup> A. Lobato,<sup>a</sup> A. Otero-de-la-Roza,<sup>a</sup> M. A. Salvadó,<sup>a</sup>  
M. E. Arroyo-de Dompablo,<sup>b</sup> and J. M. Recio<sup>a,\*</sup>

<sup>a</sup>MALTA-Consolider Team, Departamento de Química Física y Analítica, Universidad de Oviedo,  
E-33006 Oviedo, Spain

<sup>b</sup>Departamento de Química Inorgánica, Universidad Complutense de Madrid, E-28040 Madrid,  
Spain.

## Convergence analysis of computational parameters

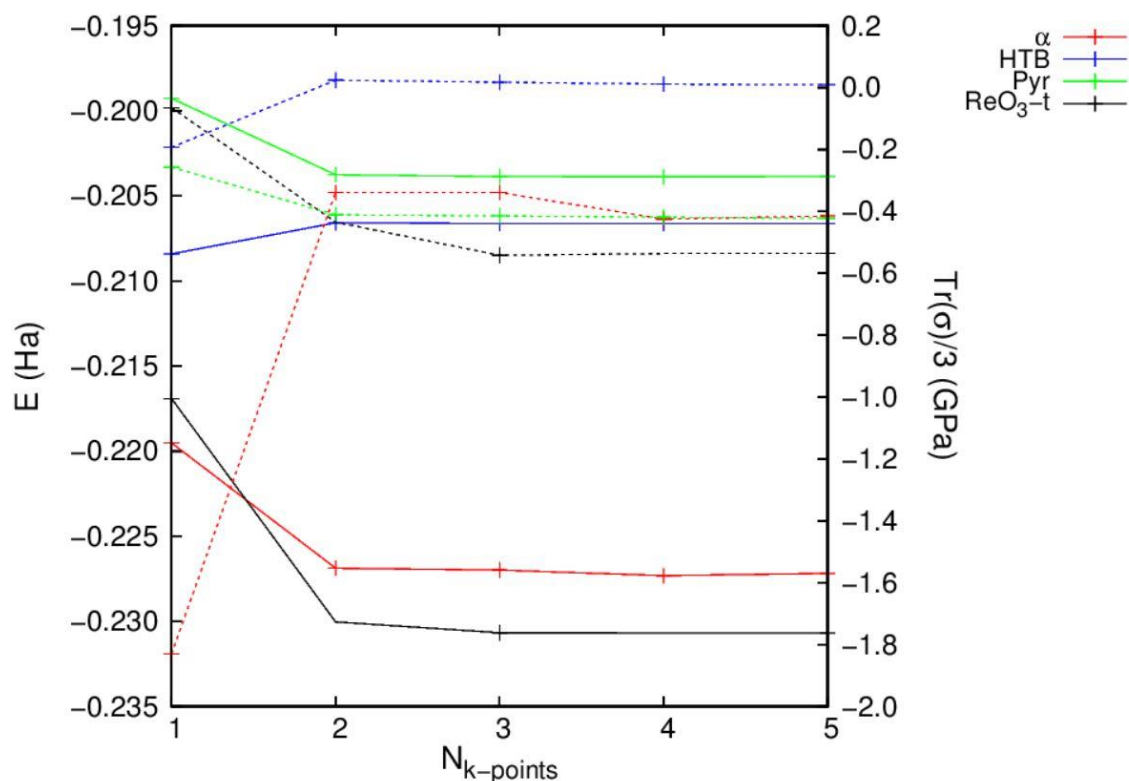

**Fig. S1:** Calculated hydrostatic pressure as a third of the stress tensor ( $\sigma$ ) trace) and energy ( $E$ ) for the four FeF3 polymorphs ( $\alpha$ , HTB, *Pyr*, and ReO<sub>3</sub>-type) in terms of the  $k$ -points number,  $N_{k\text{-points}}$ , of the sampling grid. Solid and dashed lines stand for, respectively, total energy and stress tensor.

**Table S1:** Kinetic energy cutoff values and  $k$ -point grids ( $N_{k\text{-points}} \times N_{k\text{-points}} \times N_{k\text{-points}}$ ) after convergence analysis. Using these values, energies and stress tensors are converged, respectively, to the order of  $10^{-5}$  hartree and 0.5 GPa

| Phase                 | $\alpha$ | HTB | <i>Pyr</i> | ReO <sub>3</sub> |
|-----------------------|----------|-----|------------|------------------|
| $N_{k\text{-points}}$ | 5        | 4   | 4          | 5                |
| $E_{\text{cut}}$      | 70       | 70  | 70         | 70               |

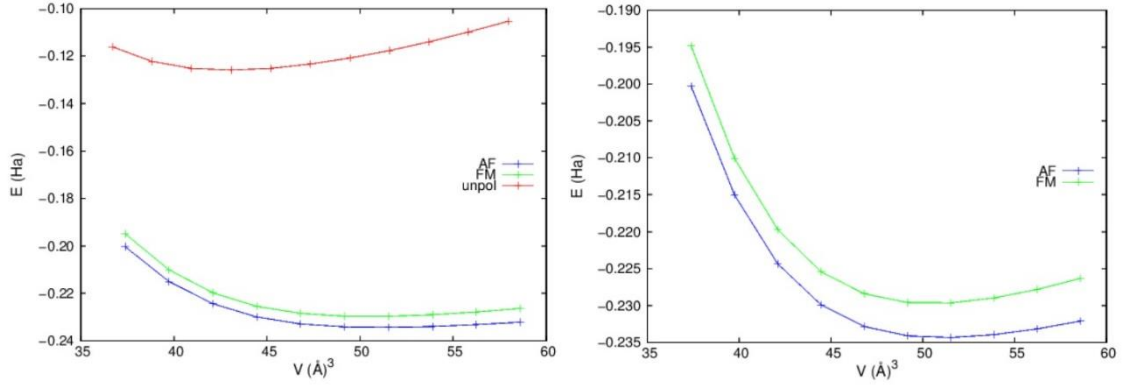

**Fig. S2:** Left:  $V$ - $E$  plot for the  $\alpha$ - $\text{FeF}_3$  phase considering the ferromagnetic, FM, antiferromagnetic, AF, and non-magnetic (unpol) orderings. Right: Zoom into the FM and AF cases.

## $E$ - $a$ - $c$ potential energy surface fitting

In order to fit the zero pressure potential energy surface as a function of the lattice parameters ( $a, c$ ) of the rhombohedral phase, we have assumed that the energy can be analytically described by a Taylor expansion around the local minima ( $a_0, c_0$ ):

$$\begin{aligned}
 E - E_0 = & p_1(a - a_0)^2 + p_2(a - a_0)(c - c_0) + p_3(c - c_0)^2 + p_4(a - a_0)^3 \\
 & + p_5(a - a_0)^2(c - c_0) + p_6(c - c_0)^2(a - a_0) + p_7(c - c_0)^3 + p_8(a - a_0)^4 \\
 & + p_9(a - a_0)^3(c - c_0) + p_{10}(c - c_0)^3(a - a_0) + p_{11}(a - a_0)^2(c - c_0)^2 \\
 & + p_{12}(c - c_0)^4 + O(h^5)
 \end{aligned}$$

where  $p_i$  and  $E_0$  are the coefficients of the expansion and the energy minima of the surface, respectively. The linear terms are set to zero in order to fulfill the condition of minima at ( $a_0, c_0$ ).

This procedure is based on the energy expansion of the elastic constants. Indeed, it can be considered a particular case where only two strains are considered. To accurately calculate the Poisson ratio, cubic and quartic terms have been included to account for the anharmonic behavior of the surface out of the equilibrium point.

The fitting has been performed using the package *cftool* from MATLAB software. Both  $a_0$  and  $c_0$  have been fixed using the values obtained from DFT calculations ( $a_0 = 5.09 \text{ \AA}$  and  $c_0 = 13.67 \text{ \AA}$ ). Least absolute residuals method with a trust region algorithm and a tolerance function of  $10^{-6}$  was used to fit the potential energy surface. Obtained fitting parameters are summarized in **Table S2** and **Figure S3**. The goodness of fit (adjusted R-square value) is 0.991 with residuals lying between  $-3 \cdot 10^{-4}$  and  $3 \cdot 10^{-4}$  hartree.

**Table S2:** Fitting parameters for the  $E$ - $\alpha$ - $c$  PES (see analytical fitting equations above).

| Parameter | Value                              | Parameter | Value                               |
|-----------|------------------------------------|-----------|-------------------------------------|
| $E_0$     | -257.2343 (hartree)                | $p_7$     | -0.002378 (hartree/Å <sup>3</sup> ) |
| $p_1$     | 0.02238 (hartree/Å <sup>2</sup> )  | $p_8$     | 0.03497 (hartree/Å <sup>4</sup> )   |
| $p_2$     | 0.01058 (hartree/Å <sup>2</sup> )  | $p_9$     | 0.01258 (hartree/Å <sup>4</sup> )   |
| $p_3$     | 0.002855 (hartree/Å <sup>2</sup> ) | $p_{10}$  | -0.00314 (hartree/Å <sup>4</sup> )  |
| $p_4$     | -0.03215 (hartree/Å <sup>3</sup> ) | $p_{11}$  | 0.00394 (hartree/Å <sup>4</sup> )   |
| $p_5$     | -0.01103 (hartree/Å <sup>3</sup> ) | $p_{12}$  | 0.00310 (hartree/Å <sup>4</sup> )   |
| $p_6$     | -0.00058 (hartree/Å <sup>3</sup> ) |           |                                     |

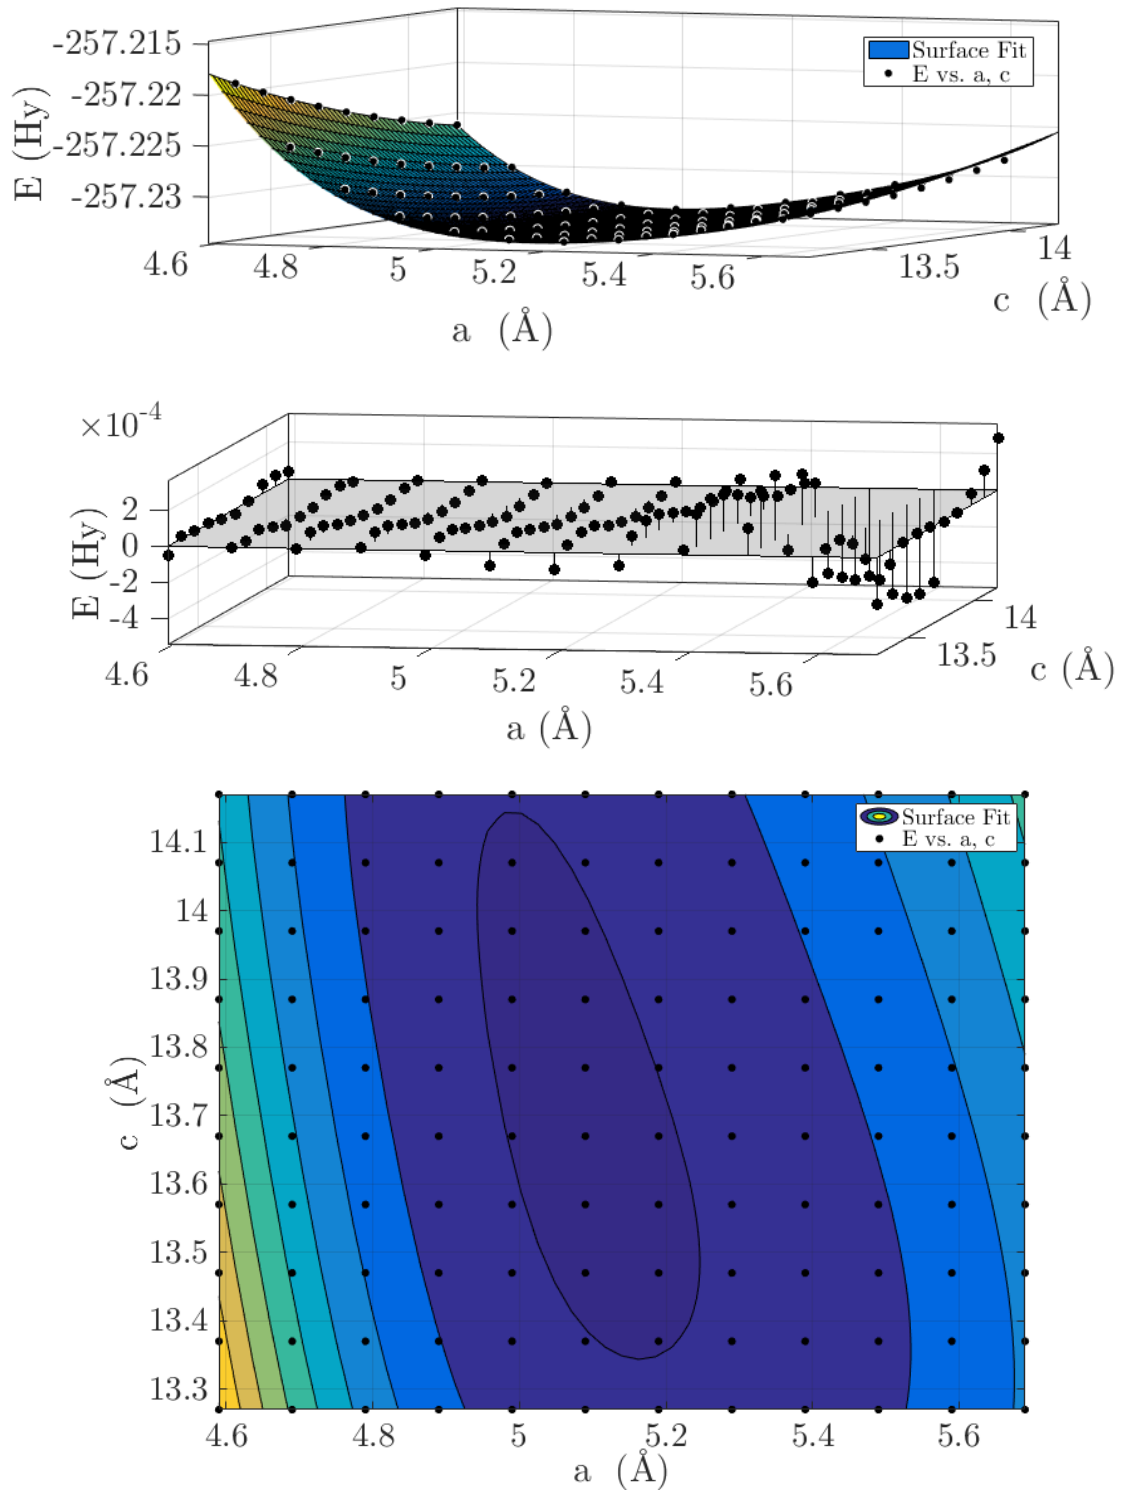

**Fig. S3:** Top:  $E$ - $a$ - $c$  data (black dots) and surface fit for the  $\alpha$ -FeF<sub>3</sub> phase. Middle: Residual plot from the surface fitting. Down: Contour map of the fitted surface
